# Supplementary material
Source: PubMed Central journal article supplement (PMC5771419)
Supplement: NIHMS922777-supplement-supplemental_figure_1.pdf [file NIHMS922777-supplement-supplemental_figure_1.pdf]

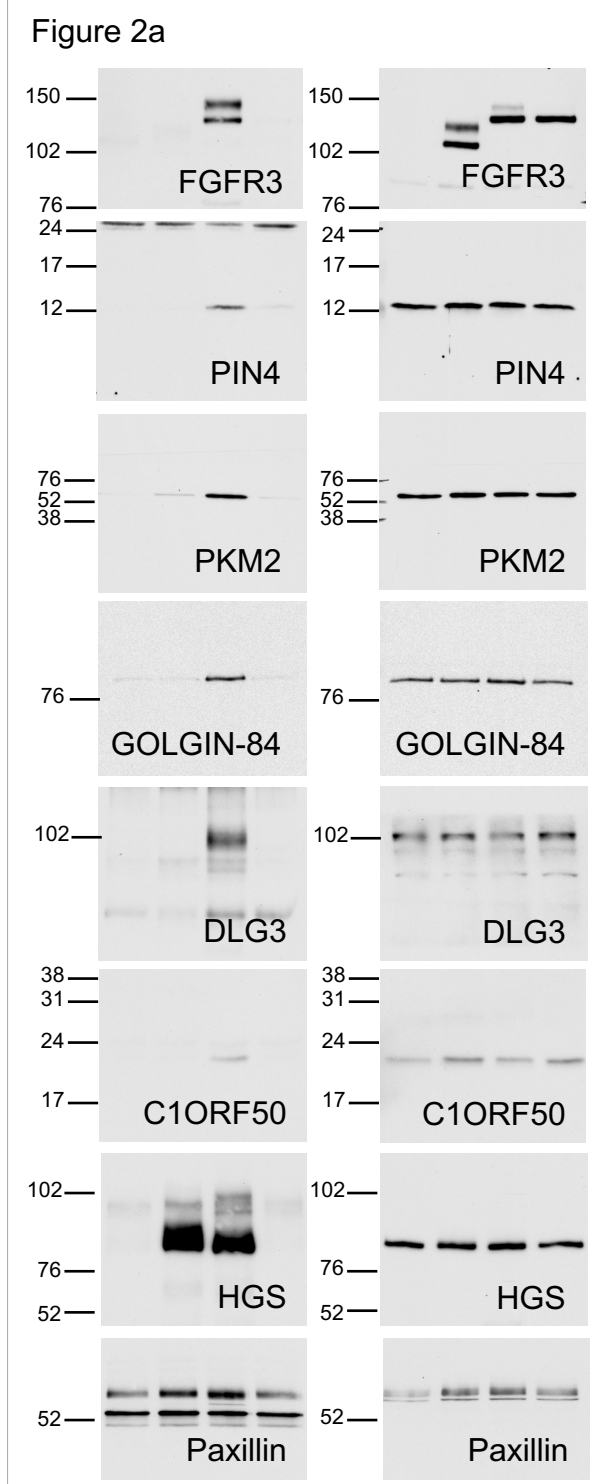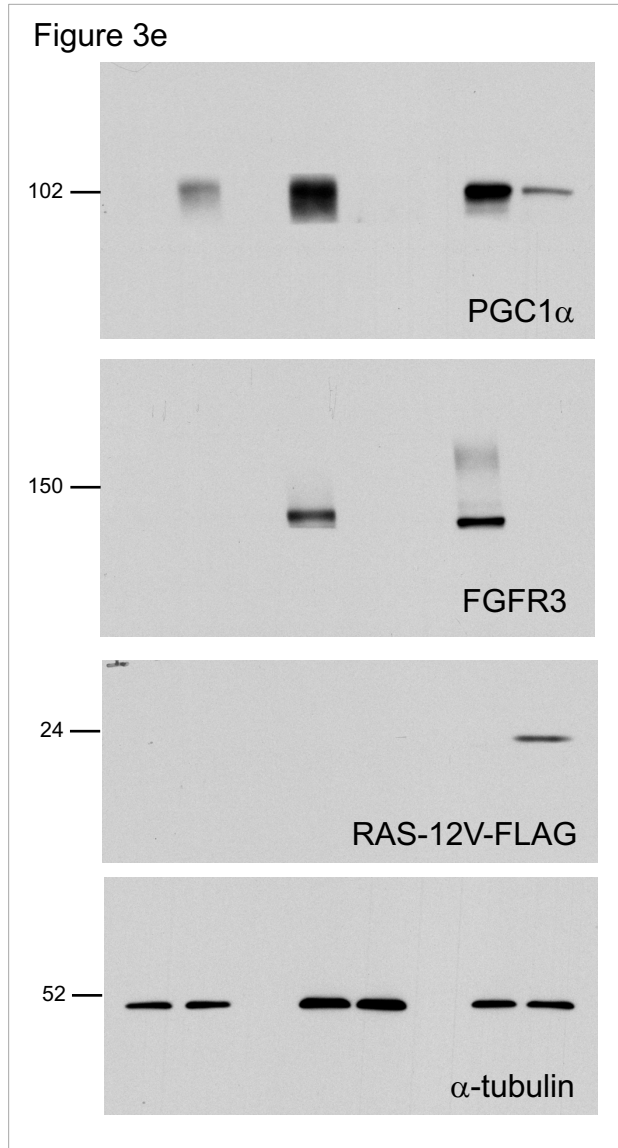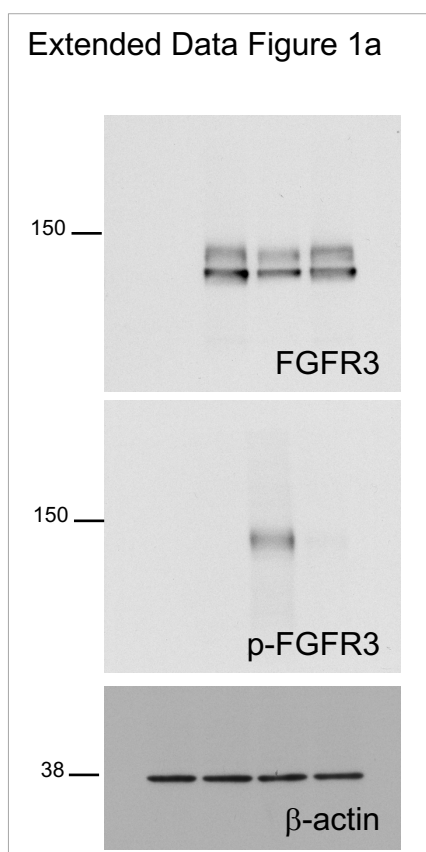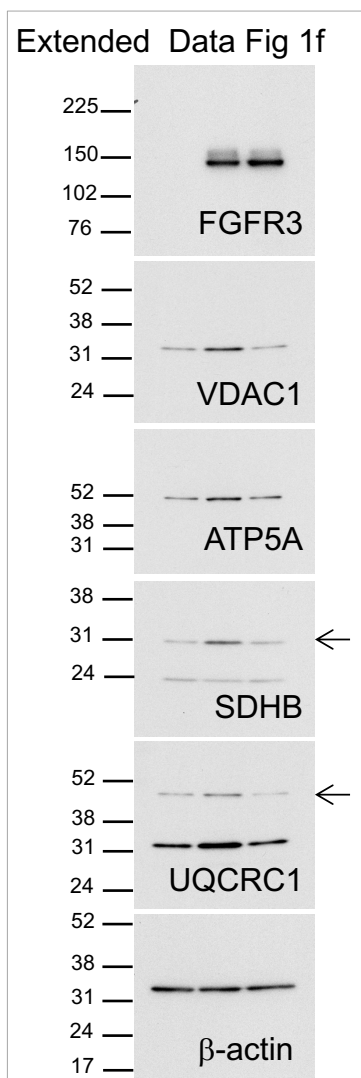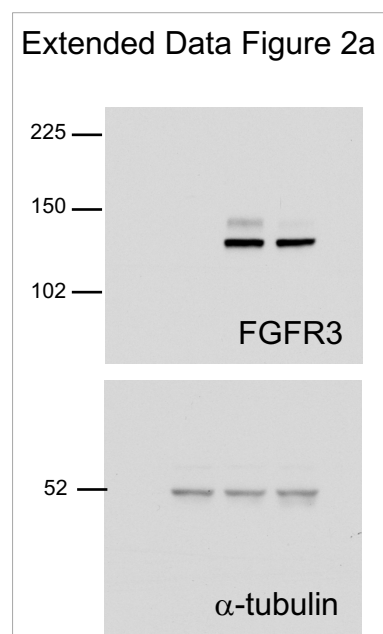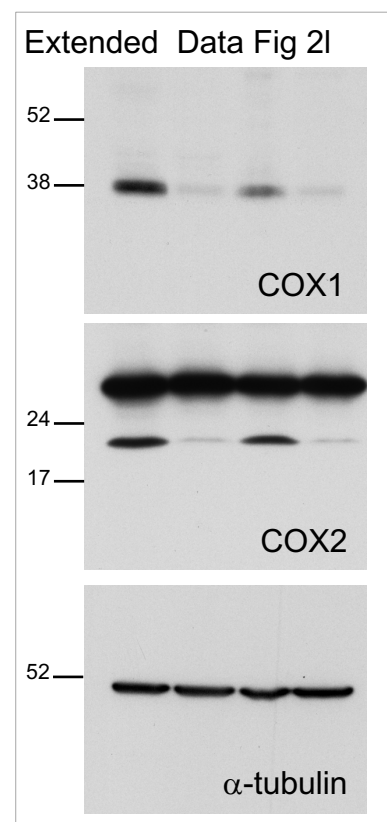

Extended Data Figure 3b

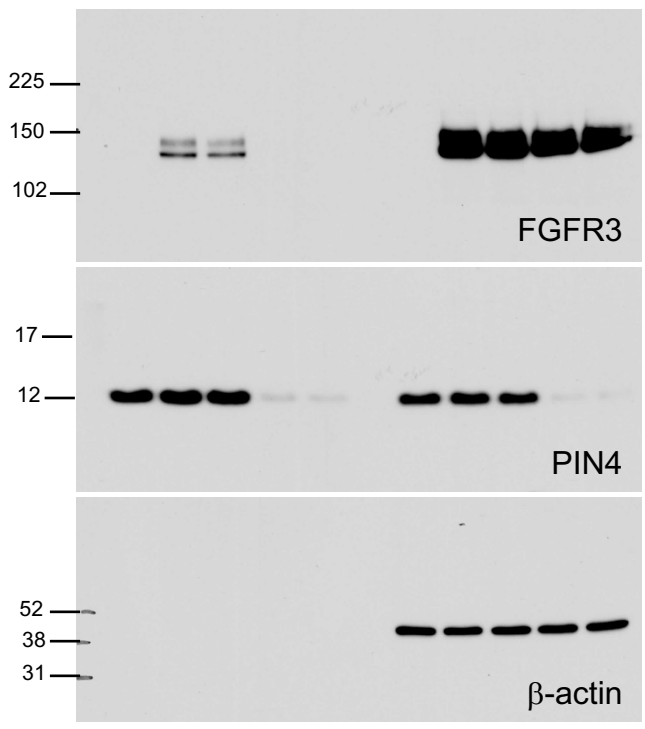

Extended Data Figure 3c

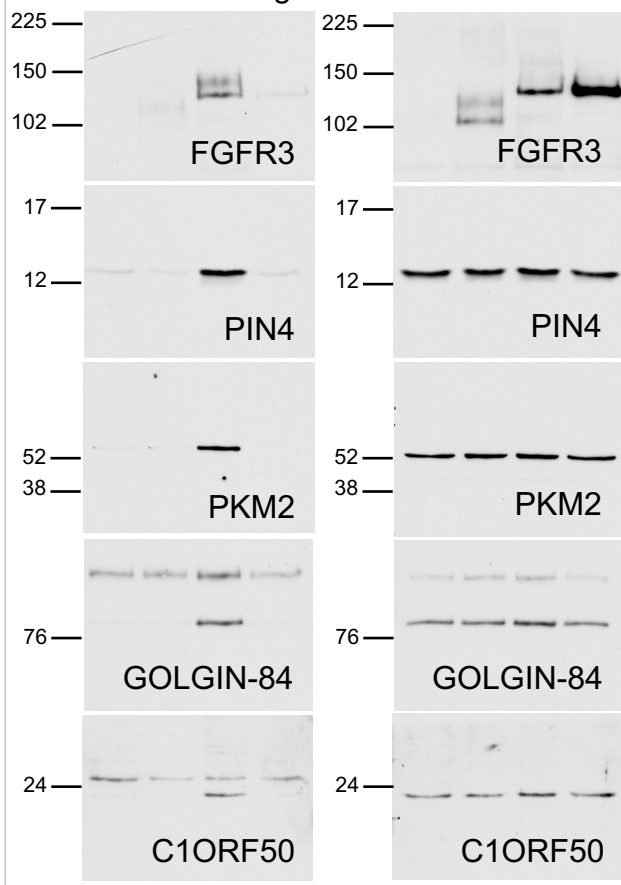

Extended Data Figure 3d

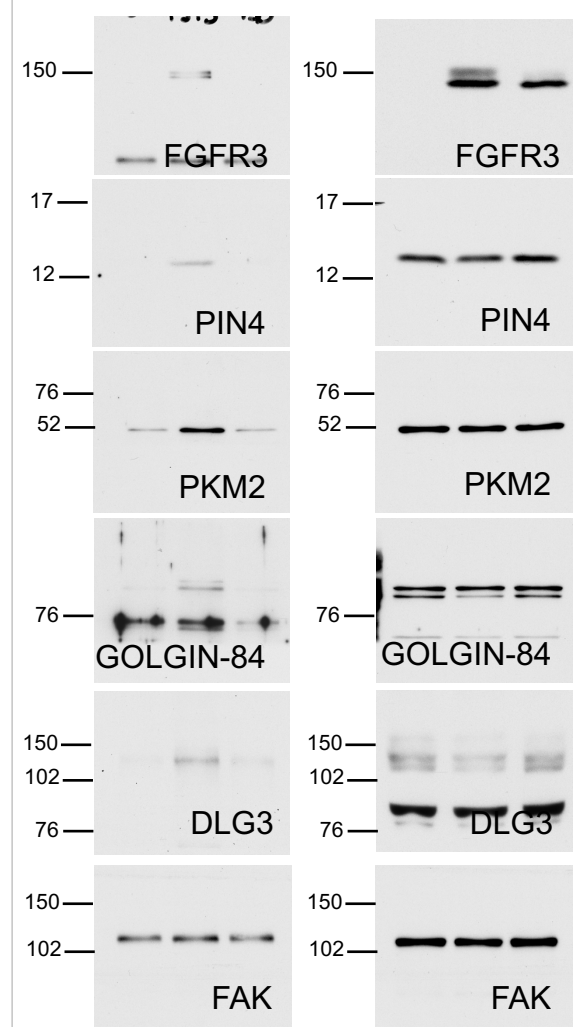

Extended Data Figure 3e

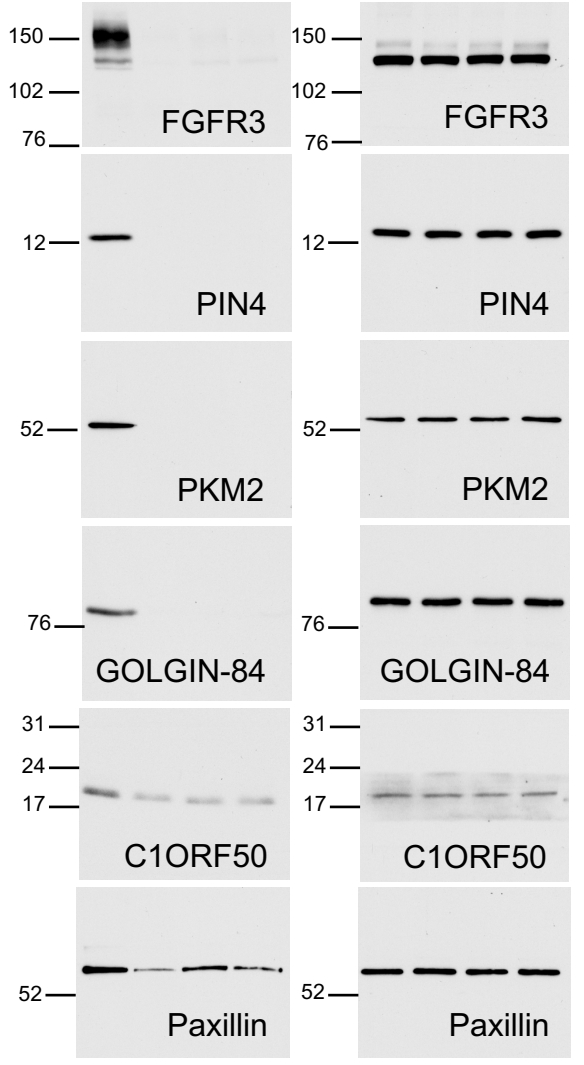

Extended Data Fig 3f

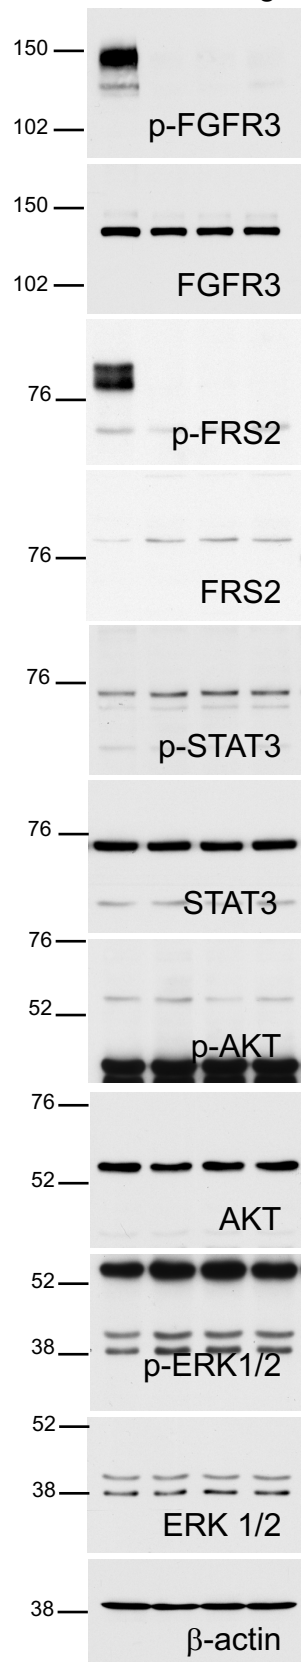

Extended Data Figure 3g

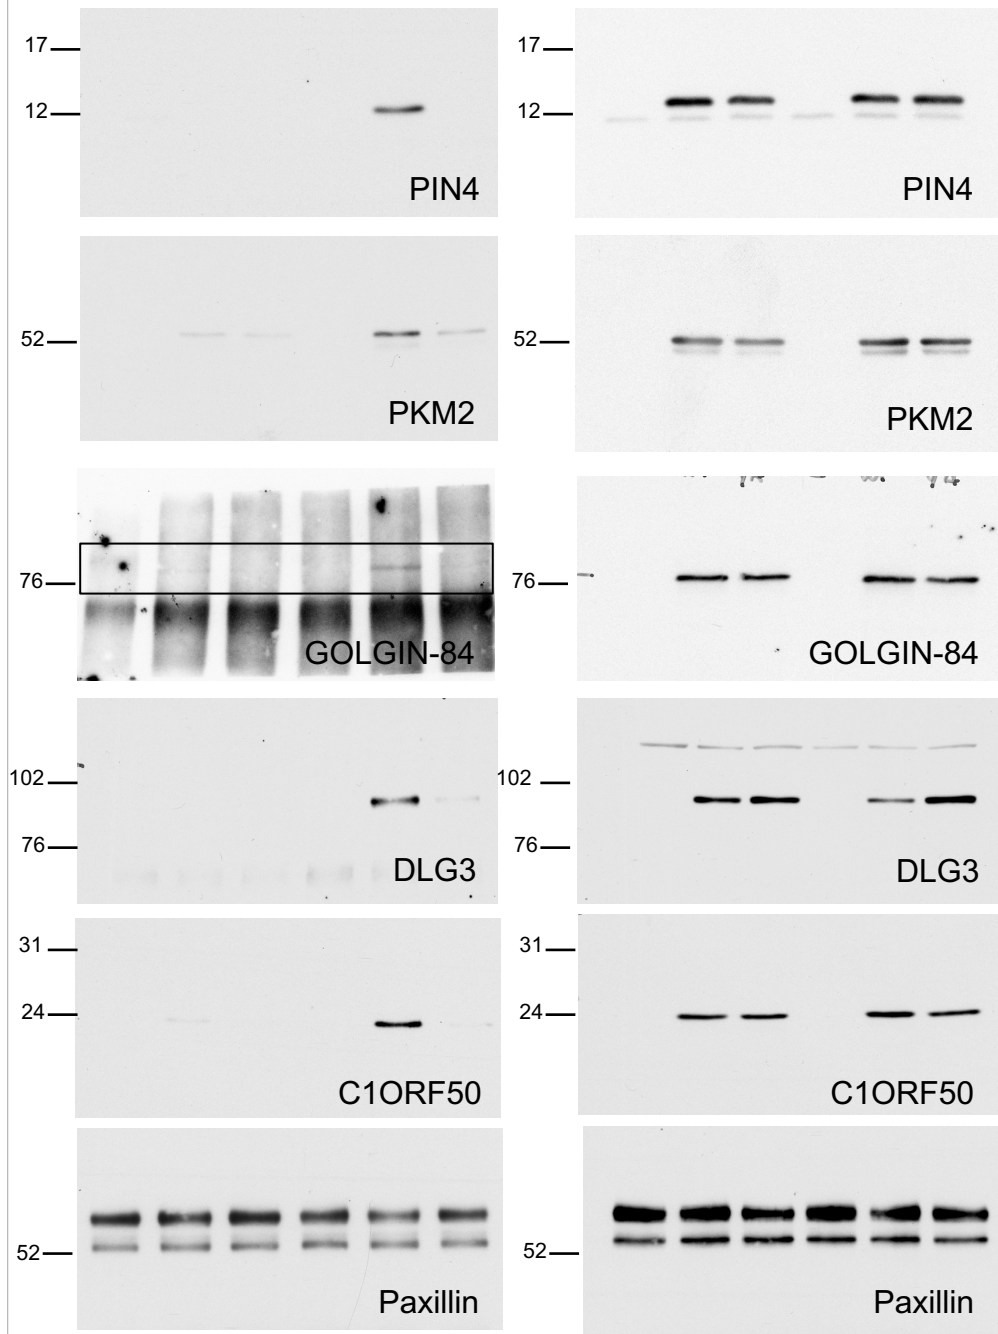

Extended Data Figure 3i

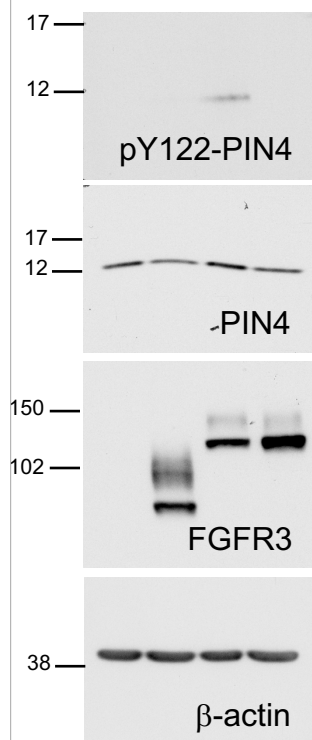

Extended Data Figure 4a

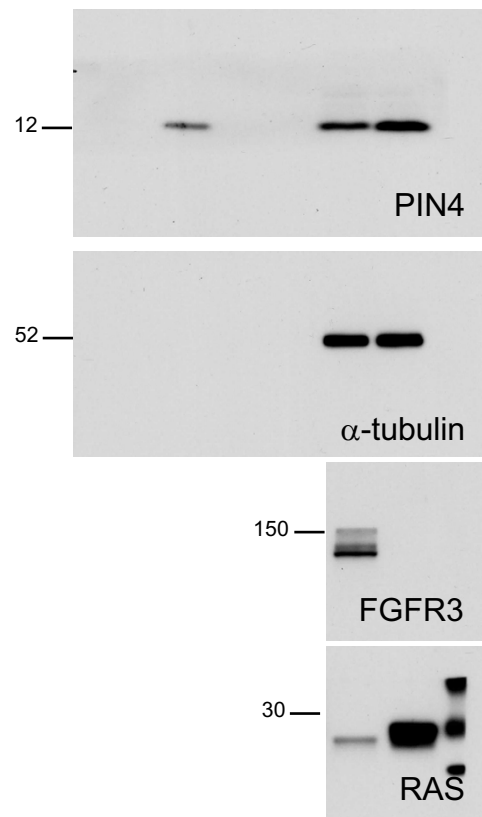

Extended Data Figure 4f

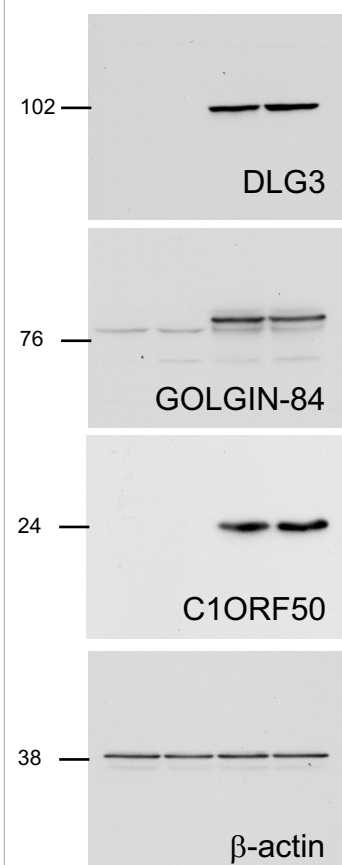

Extended Data Figure 4g

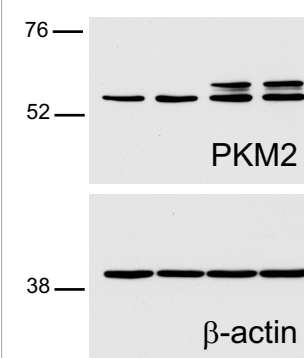

Extended Data Figure 4h

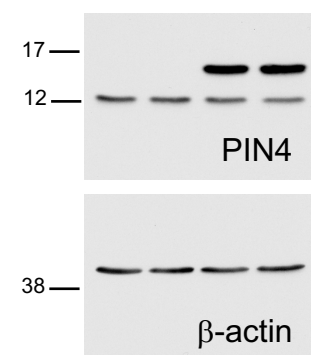

Extended Data Figure 4i

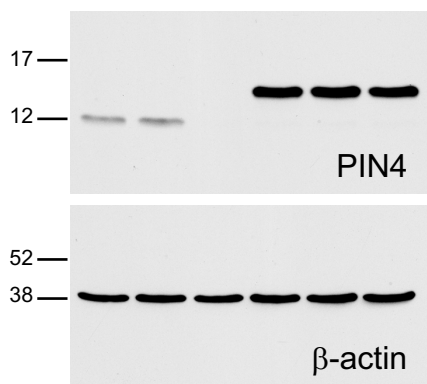

Extended Data Figure 7a

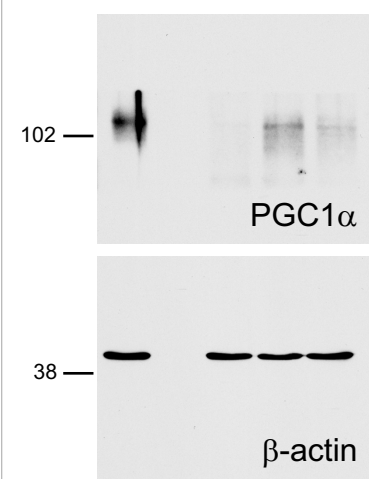

Extended Data Figure 7e

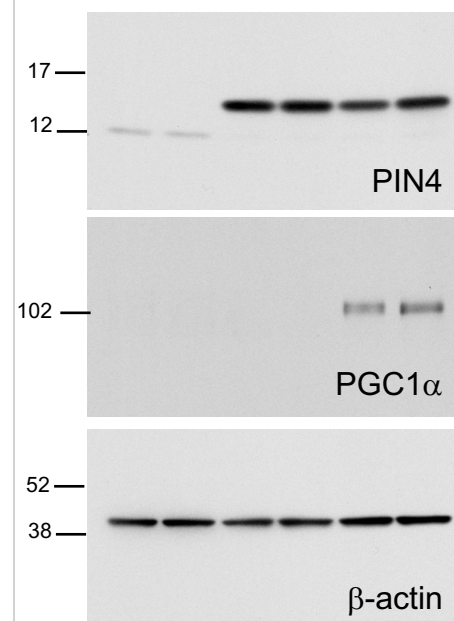

Extended Data Figure 7h

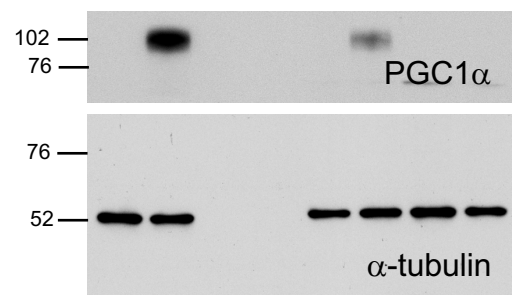

Extended Data Figure 7j

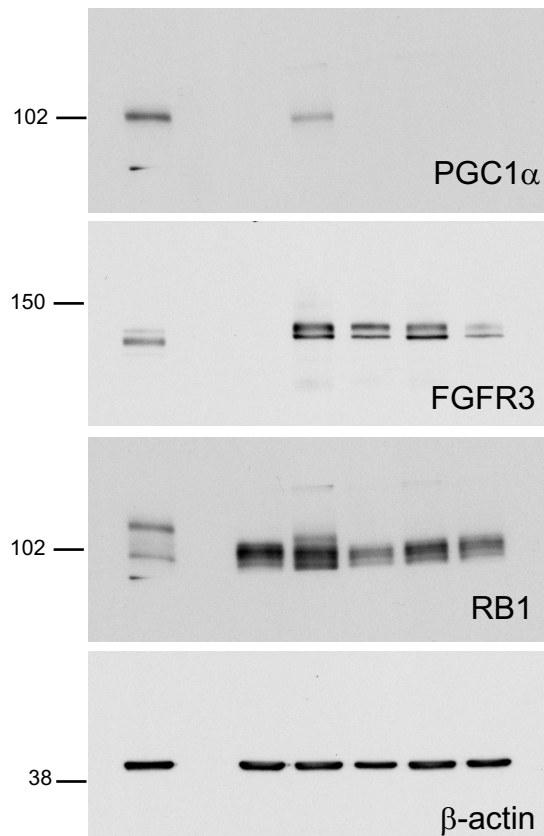

Extended Data Figure 7m

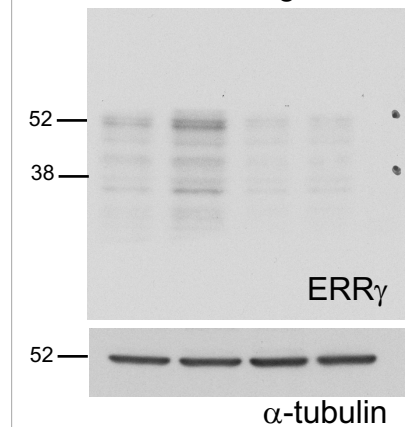

Extended data Figure 8h

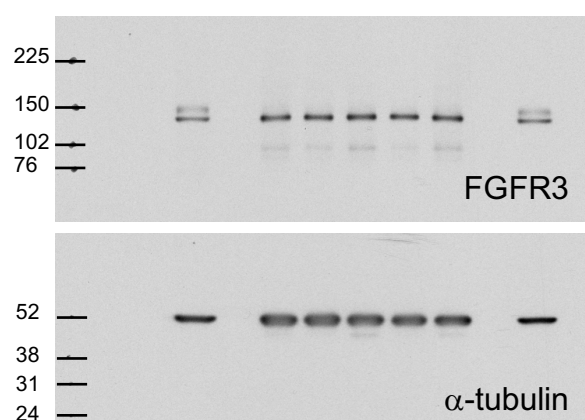

Extended Data Figure 10c

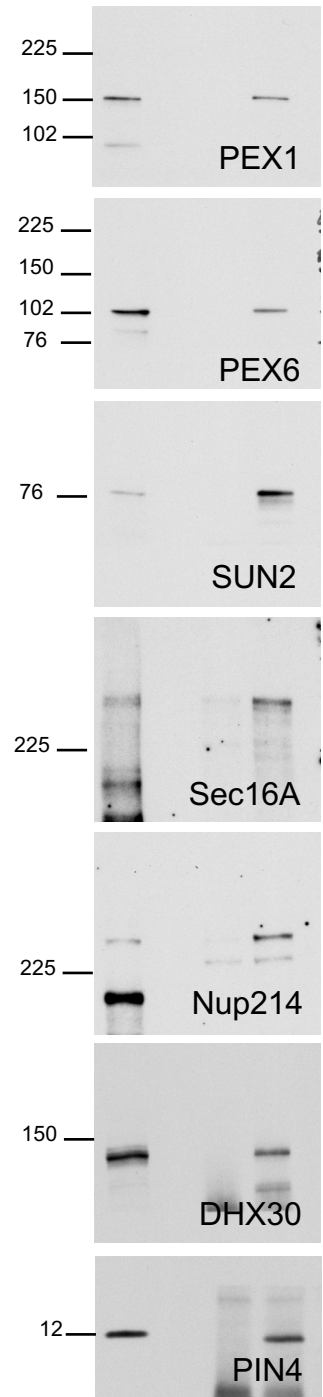

Extended Data Figure 10d

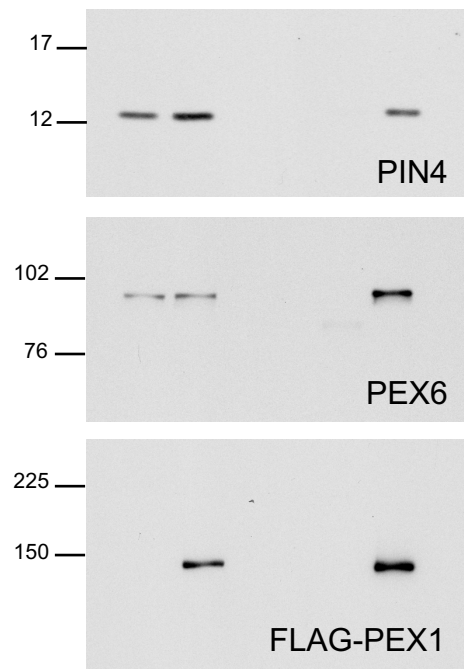

Extended Data Figure 10f

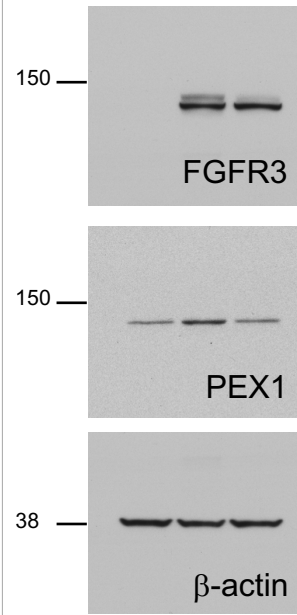

Extended Data Figure 10g

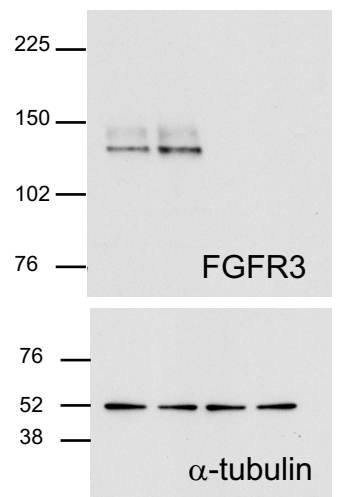

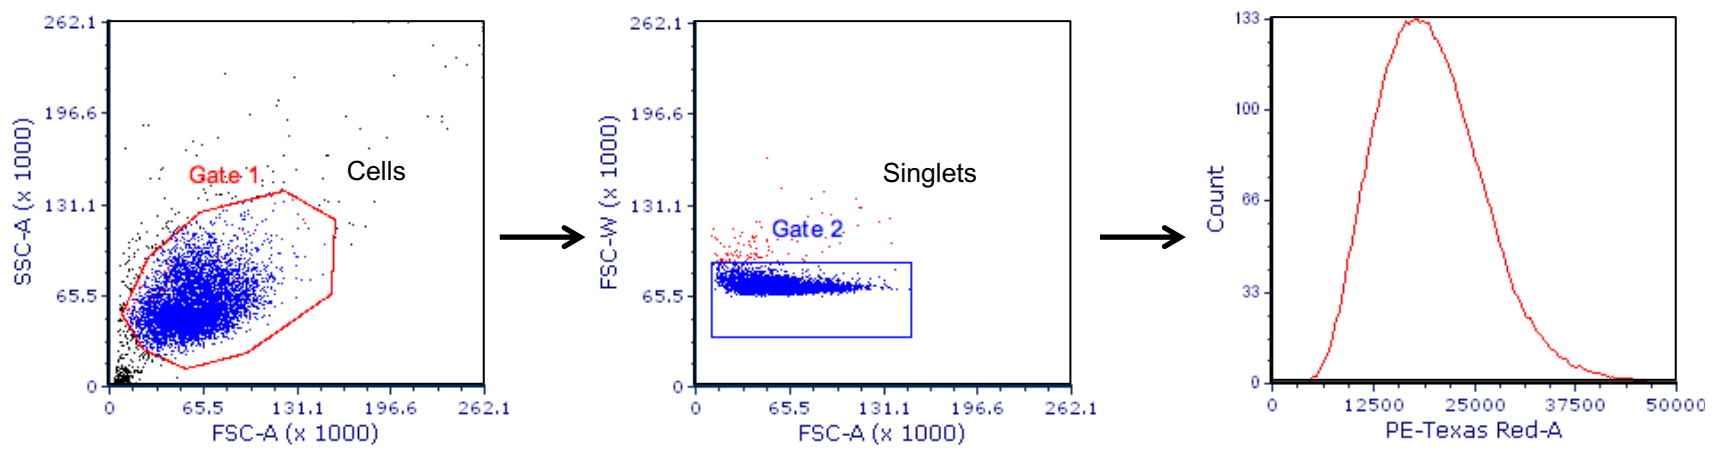

**Supplementary Info.** Flow cytometry gating strategy.
